# Supplementary material for: Determinants of mer Promoter Activity from Pseudomonas aeruginosa
Source: MDPI journal article supplement (doi:10.3390/genes15040490), 2024-04-13
Supplement: s1 [file s1]

**Supplementary Materials:**

**Determinants of *mer* promoter activity from *Pseudomonas*  
*aeruginosa***

*Qingyuan Hu, Jue Wang, Chunhong Liu, Yu Feng, Hao Chen\**

State Key Laboratory of Coordination Chemistry, School of Chemistry and Chemical Engineering,  
Nanjing University, 210023 Nanjing, China; huqingyuan1991@163.com (Q.H.);  
wj690189386@163.com (J.W.);  
liuchunhong1111@126.com (C.L.); 602023240027@smail.nju.edu.cn (Y.F.)

\* Correspondence: E-mail: chen hao@nju.edu.cn.

**Keywords:** *mer* promoter, expression activity, spacer length, position –13, guanine, synergistic regulation

## Contents

### Supporting Figures

- Fig.S1 Sequence and spacer length of *mer* promoter derivatives.
- Fig.S2 Schematic representation of DNA conformation in the region between the  $-35$  and  $-10$  elements for *mer* promoter derivatives.
- Fig.S3 Plasmid maps of the vectors constructed in this study.
- Fig.S4 Mercury ion concentration affects bacterial growth and luminescence intensity.
- Fig.S5 Visualization of derivative expression activity.
- Fig.S6 Expression activity of *mer* promoter derivatives.
- Fig.S7 The sfGFP expression levels from derivatives M1-M17 without mercury in three different systems (pPmerS, pMPmerS and pMPmerS+pPcpc560M).
- Fig.S8 Expression levels of sfGFP in *E. coli* from different promoters analyzed with Image Lab™ (Bio-Rad).
- Fig.S9 Transcript levels of gene (*luxA* or *sfGFP*) downstream of the *mer* promoter (WT, derivatives M10 or M13).
- Fig.S10 Alignment of N-terminal sequences of MerR family transcription factors.
- Fig.S11 Schematic comparison of the B-form promoter DNA and distorted promoter DNA.
- Fig.S12 Expression levels of the *merR* gene from wild type and different derivatives.
- Fig.S13 MerR binding to promoter DNA of wild type and derivatives.
- Fig.S14 Sequence alignment of promoters with 19 bp spacer between  $-10$  and  $-35$  elements regulated by MerR family TFs.
- Fig.S15 Contact of region 2 ( $\sigma_2$ ) in sigma factor 70 ( $\sigma_{70}$ ) with promoter positions  $-13$  and  $-12$  in various RNAP holoenzyme complex crystals.
- Fig.S16 Schematic structures of the four bases and common functional groups of guanine and thymine.

### Supporting Tables

- Table S1 Primers for the template plasmid construction.
- Table S2 Mutagenic primers for the *mer* promoter.
- Table S3 DNA for the electrophoretic mobility shift assay (EMSA).
- Table S4 Expression activity of *mer* promoter derivatives in the pMPmerS plasmid.
- Table S5 Primers for Reverse-transcription PCR (RT-PCR) assay.
- Table S6 Promoter sequences.

### Reference

## Supporting Figures

|                            | Mutation position |                                                  | Spacer length |
|----------------------------|-------------------|--------------------------------------------------|---------------|
| Previous studies           |                   |                                                  |               |
|                            | -31 or -30        | ATCGCTTTGACTCAGTACATGAGTACGGAAGTAAGGTACGCTATCCAA | 18 bp         |
|                            | -24               | ATCGCTTTGACTCCGTACAGGAGTACGGAAGTAAGGTACGCTATCCAA | 18 bp         |
|                            | -18               | ATCGCTTTGACTCCGTACATGAGTACGGAAGTAAGGTACGCTATCCAA | 18 bp         |
|                            | -15 or -14        | ATCGCTTTGACTCCGTACATGAGTACGGAAGTAAGGTACGCTATCCAA | 18 bp         |
|                            | -14 to -13        | ATCGCTTTGACTCCGTACATGAGTACGGAAGTAAGGTACGCTATCCAA | 17 bp         |
| This study                 |                   |                                                  |               |
| <i>P<sub>mer</sub></i>     | Wild type         | ATCGCTTTGACTCCGTACATGAGTACGGAAGTAAGGTACGCTATCCAA | 19 bp         |
| <i>P<sub>mer-M1</sub></i>  | -31 or -30        | ATCGCTTTGACTCAGTACATGAGTACGGAAGTAAGGTACGCTATCCAA | 18 bp         |
| <i>P<sub>mer-M2</sub></i>  | -30 to -29        | ATCGCTTTGACTCAGTACATGAGTACGGAAGTAAGGTACGCTATCCAA | 17 bp         |
| <i>P<sub>mer-M3</sub></i>  | -30 to -28        | ATCGCTTTGACTCAGTACATGAGTACGGAAGTAAGGTACGCTATCCAA | 16 bp         |
| <i>P<sub>mer-M4</sub></i>  | -25               | ATCGCTTTGACTCCGTACATGAGTACGGAAGTAAGGTACGCTATCCAA | 18 bp         |
| <i>P<sub>mer-M5</sub></i>  | -24 to -25        | ATCGCTTTGACTCCGTACATGAGTACGGAAGTAAGGTACGCTATCCAA | 17 bp         |
| <i>P<sub>mer-M6</sub></i>  | -23 to -25        | ATCGCTTTGACTCCGTACATGAGTACGGAAGTAAGGTACGCTATCCAA | 16 bp         |
| <i>P<sub>mer-M7</sub></i>  | -20               | ATCGCTTTGACTCCGTACATGAGTACGGAAGTAAGGTACGCTATCCAA | 18 bp         |
| <i>P<sub>mer-M8</sub></i>  | -19 to -20        | ATCGCTTTGACTCCGTACATGAGTACGGAAGTAAGGTACGCTATCCAA | 17 bp         |
| <i>P<sub>mer-M9</sub></i>  | -18 to -20        | ATCGCTTTGACTCCGTACATGAGTACGGAAGTAAGGTACGCTATCCAA | 16 bp         |
| <i>P<sub>mer-M10</sub></i> | -15 or -14        | ATCGCTTTGACTCCGTACATGAGTACGGAAGTAAGGTACGCTATCCAA | 18 bp         |
| <i>P<sub>mer-M11</sub></i> | -13               | ATCGCTTTGACTCCGTACATGAGTACGGAAGTAAGGTACGCTATCCAA | 18 bp         |
| <i>P<sub>mer-M12</sub></i> | -15 to -14        | ATCGCTTTGACTCCGTACATGAGTACGGAAGTAAGGTACGCTATCCAA | 17 bp         |
| <i>P<sub>mer-M13</sub></i> | -14 to -13        | ATCGCTTTGACTCCGTACATGAGTACGGAAGTAAGGTACGCTATCCAA | 17 bp         |
| <i>P<sub>mer-M14</sub></i> | -15 to -13        | ATCGCTTTGACTCCGTACATGAGTACGGAAGTAAGGTACGCTATCCAA | 16 bp         |
| <i>P<sub>mer-M15</sub></i> | -13               | ATCGCTTTGACTCCGTACATGAGTACGGAAGTAAGGTACGCTATCCAA | 19 bp         |
| <i>P<sub>mer-M16</sub></i> | -13               | ATCGCTTTGACTCCGTACATGAGTACGGAAGTAAGGTACGCTATCCAA | 19 bp         |
| <i>P<sub>mer-M17</sub></i> | -13               | ATCGCTTTGACTCCGTACATGAGTACGGAAGTAAGGTACGCTATCCAA | 19 bp         |
|                            |                   | 5'- -35 element -10 element -3'                  |               |

Fig.S1 Sequence and spacer length of *mer* promoter derivatives. The -35 element is purple and the -10 element is pink. Mutation sites are marked with dotted boxes on a yellow background.

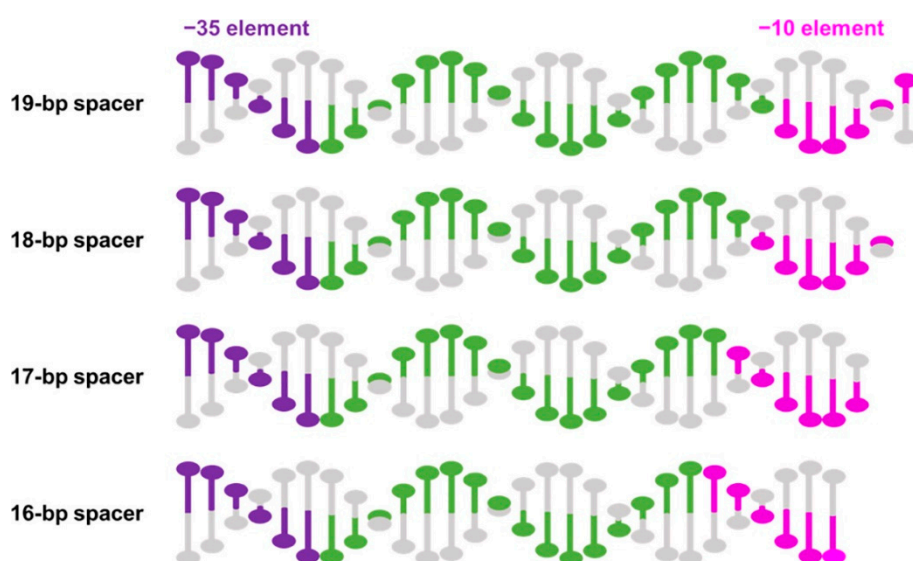

Fig.S2 Scheme of the DNA conformation of the region between the -35 and -10 elements of *mer* promoter derivatives. The -35 element is purple, the -10 element is pink, and the intervening

spacer is green.

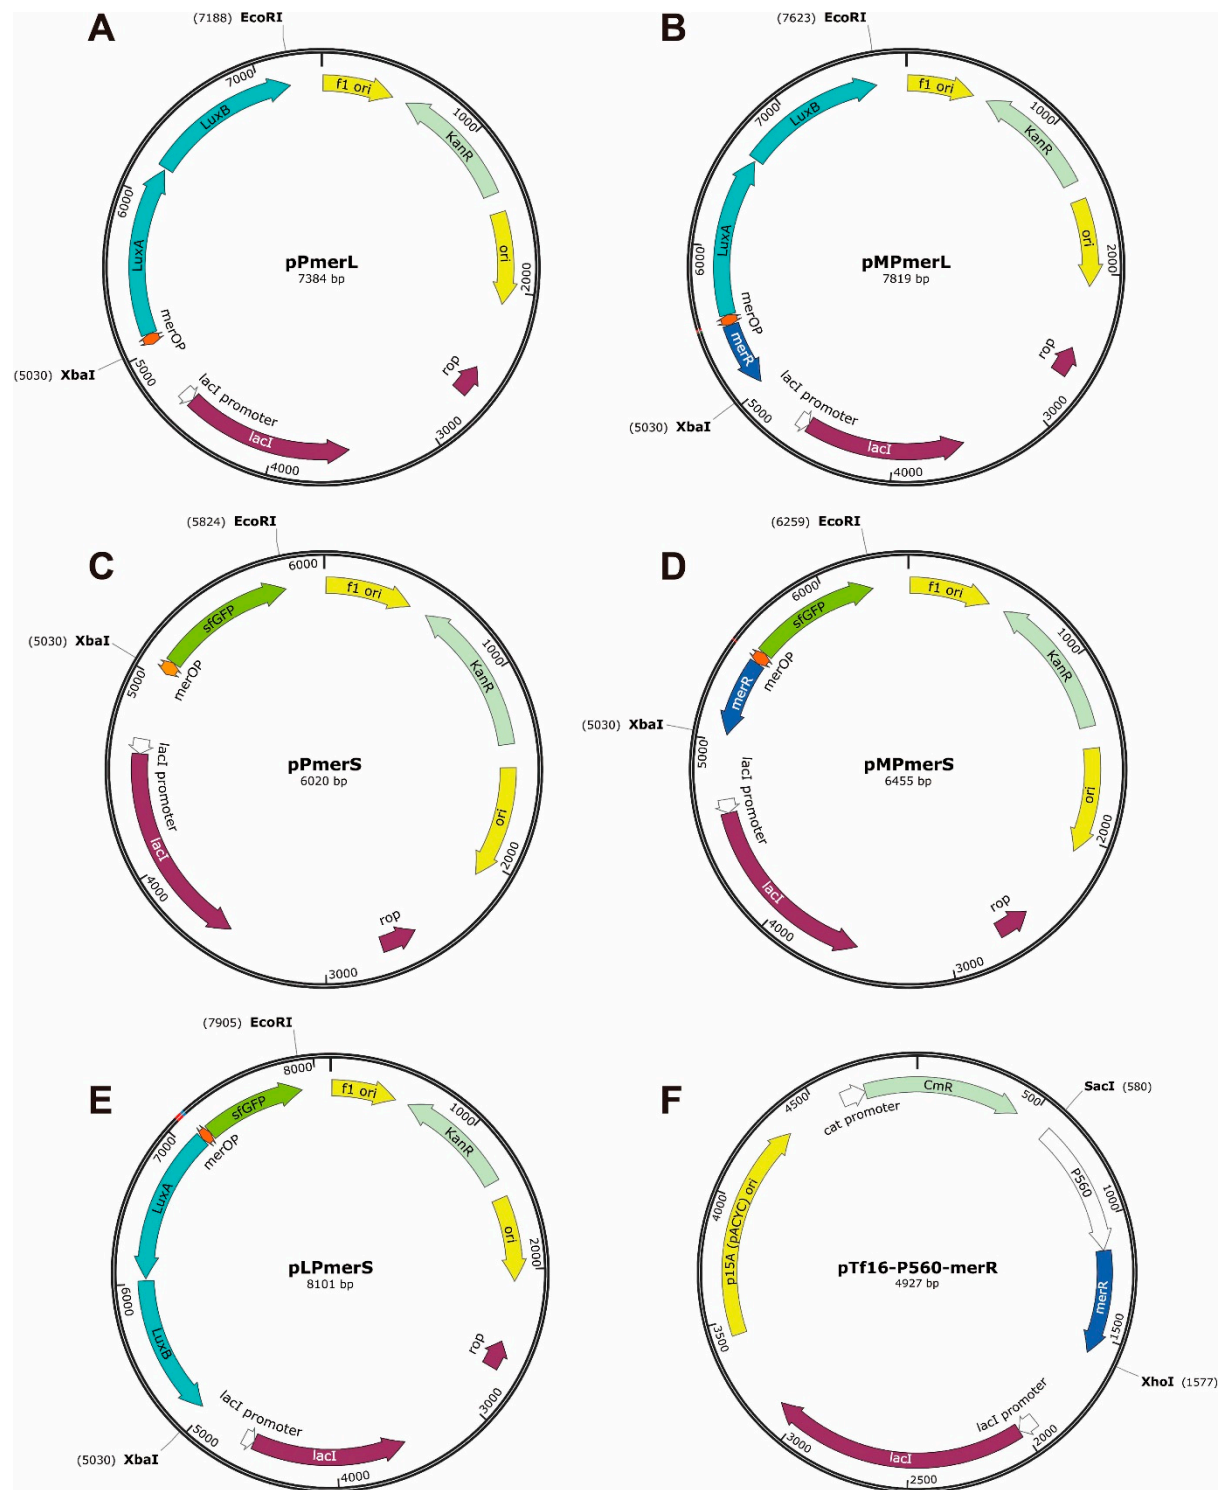

**Fig.S3** Plasmid maps of the vectors constructed in this study. (A) pPmerL, (B) pMPmerL, (C) pPmerS, (D) pMPmerS, (E) pLPmerS, (F) pPcpc560M.



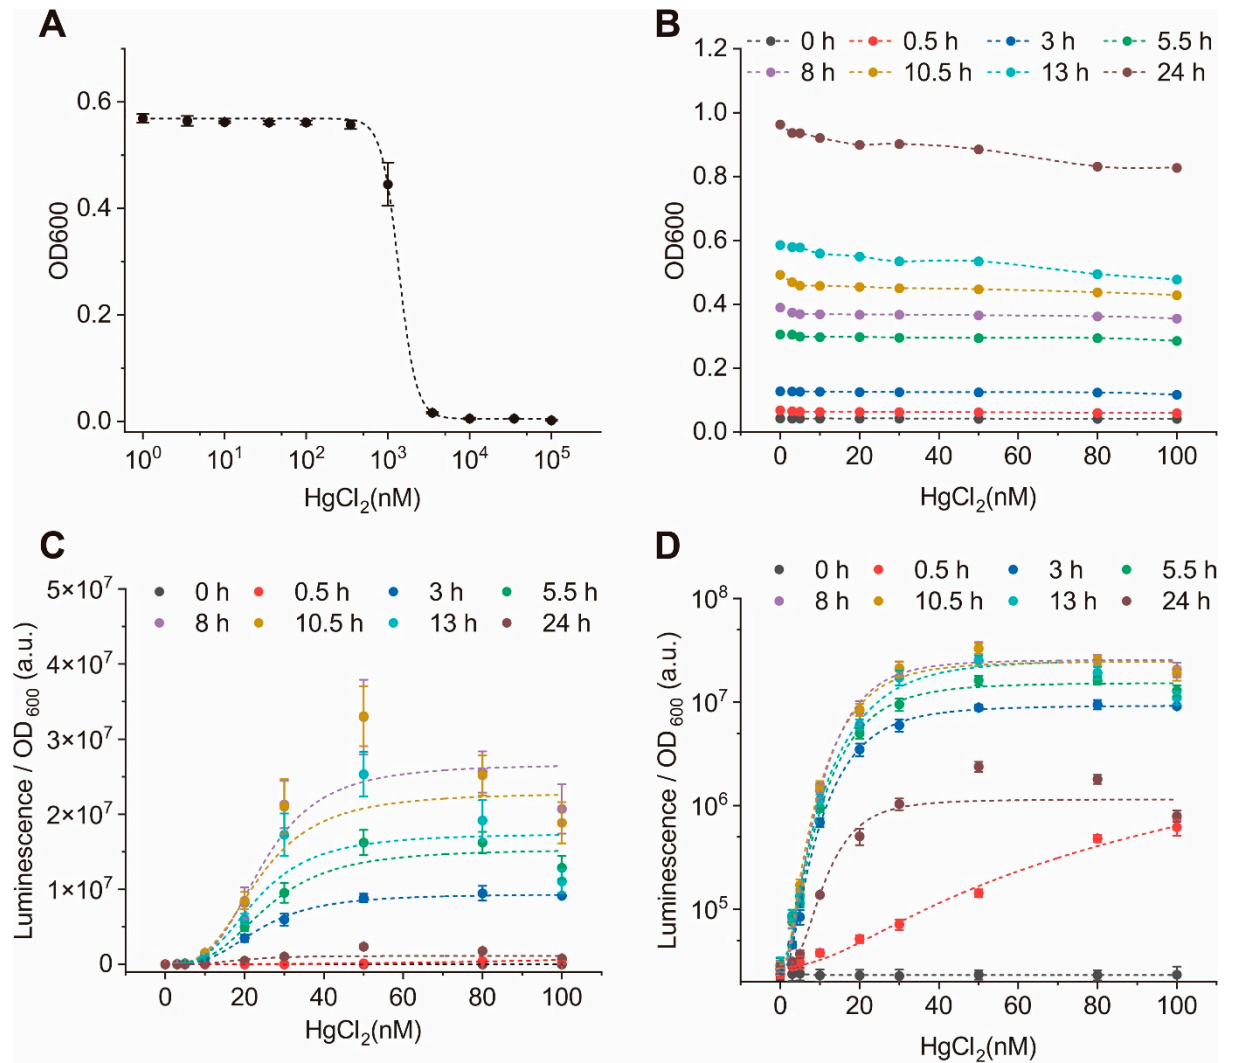

**Fig.S4 Mercury ion concentration affects bacterial growth and luminescence intensity.** (A) Toxicity of mercury ions (0-100  $\mu$ M) to *Escherichia coli*. (B) Toxicity of mercury ions (0-100 nM) to *E. coli* containing the pMPmerL plasmid at different times. (C) Mercury ions (0-100 nM) induced luminescence in *E. coli* containing the pMPmerL plasmid (linear coordinates). (D) Mercury ions (0-100 nM) induced luminescence in *E. coli* containing the pMPmerL plasmid (logarithmic coordinates).

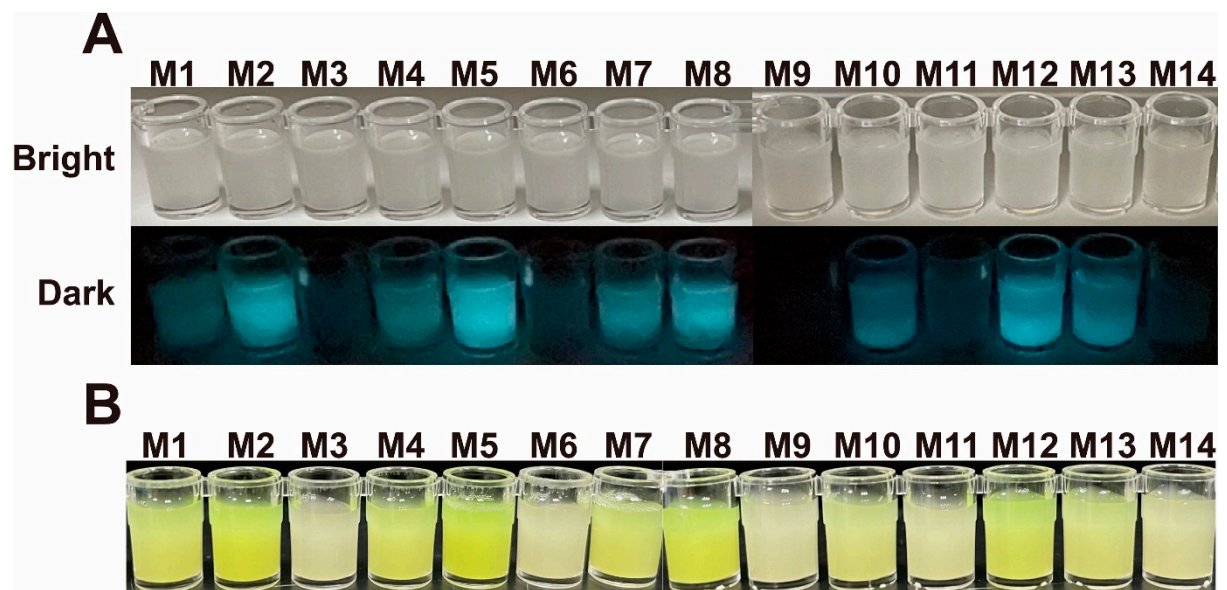

**Fig.S5 Visualization of derivative expression activity.** (A) Visualization of the difference in luminescence levels between the derivatives M1-M14 of the pMPmerL plasmid. (B) Visualization of the difference in fluorescence levels between the derivatives M1-M14 of the pMPmerS plasmid.

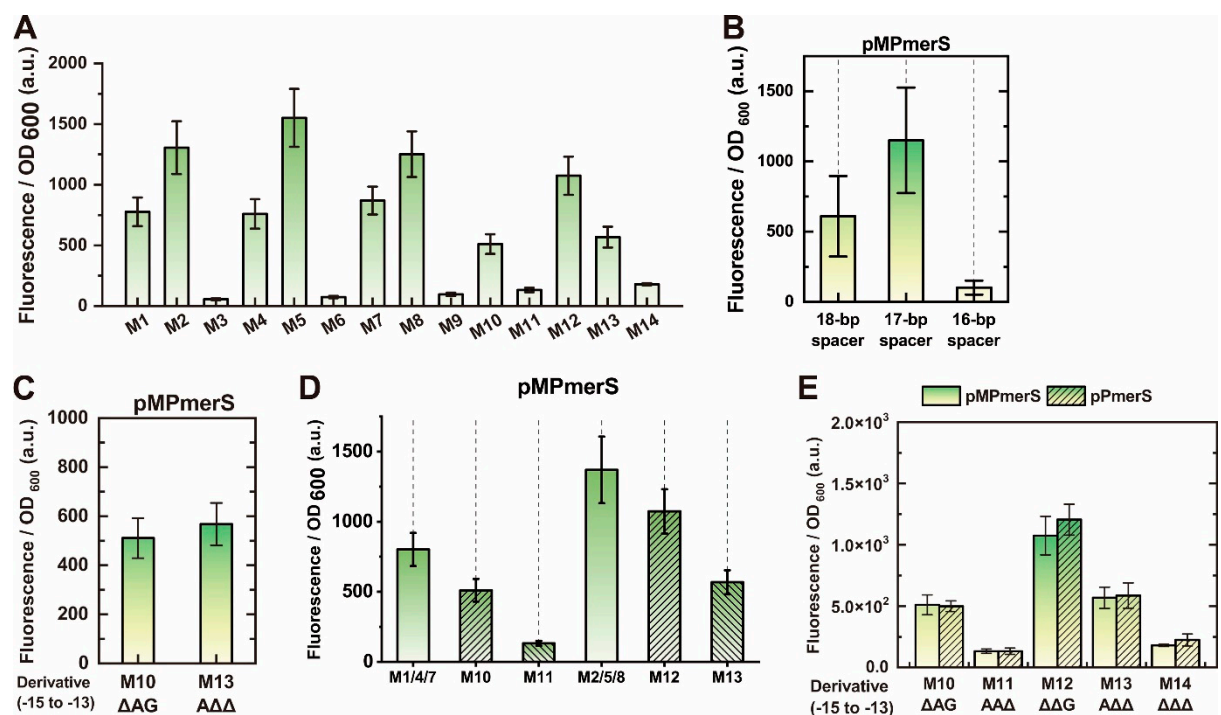

**Fig.S6 Expression activity of *mer* promoter derivatives.** (A) Fluorescent gene expression levels from derivatives M1 to M14 of the pMPmerL plasmid. (B) Comparison of fluorescence intensity from derivatives with different length spacers. (C) Similarity of promoter activity between derivative M10 and derivative M13. (D) Comparison of fluorescence intensity of derivatives grouped by position or number of deleted base pairs. (E) Comparison of fluorescence intensity of *P<sub>mer</sub>* derivatives M10 to M14 in the presence and absence of MerR.

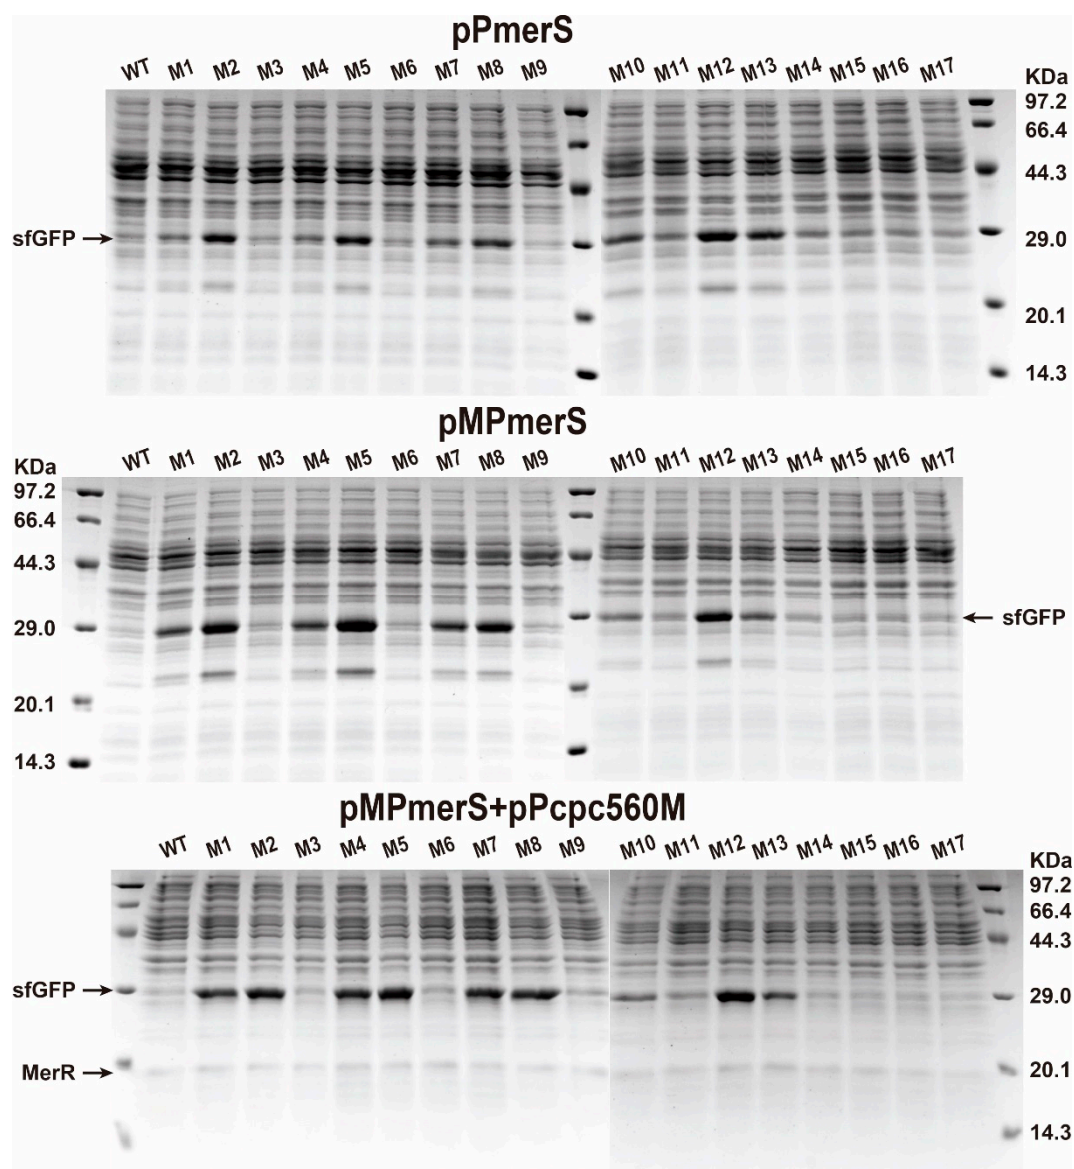

**Fig.S7** The sfGFP expression levels from derivatives M1-M17 without mercury in three different systems (pPmerS, pMPmerS and pMPmerS+pPcpc560M).

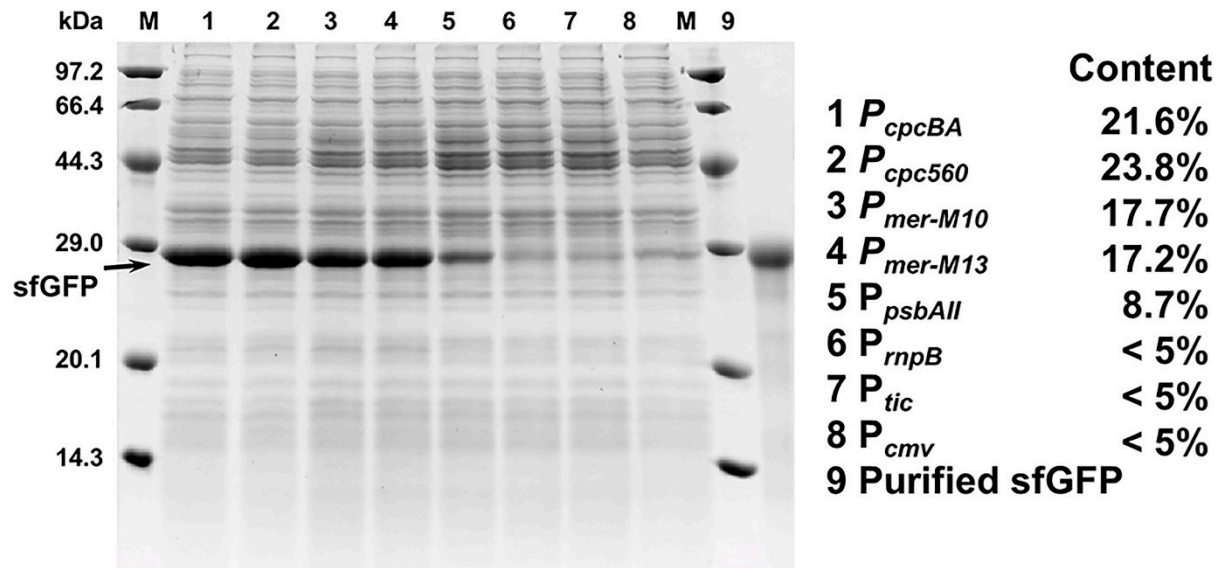

**Fig.S8** Expression levels of sfGFP in *E. coli* from different promoters analyzed with Image Lab™ (Bio-Rad). Lanes 1 to 8 are promoters  $P_{cpcBA}$  (*cpcBA* promoter of *Synechocystis* sp. 6803, strong) [76],  $P_{cpc560}$  (*cpc560* promoter of *Synechocystis* sp. 6803, strong) [63],  $P_{mer-M10}$  (*merT* promoter mutant M10 of *Pseudomonas aeruginosa*, strong),  $P_{mer-M13}$  (*merT* promoter mutant M13 of *Pseudomonas aeruginosa*, strong),  $P_{psbAII}$  (*psbAII* promoter of *Synechocystis* sp. 6803) [64],  $P_{rnpB}$  (*rnpB* promoter of *Synechocystis* sp. 6803) [65],  $P_{tic}$  (*tic* promoter of *Synechocystis* sp. 6803) [66] and  $P_{cmv}$  (*cmv* promoter of Human betaherpesvirus) [67].

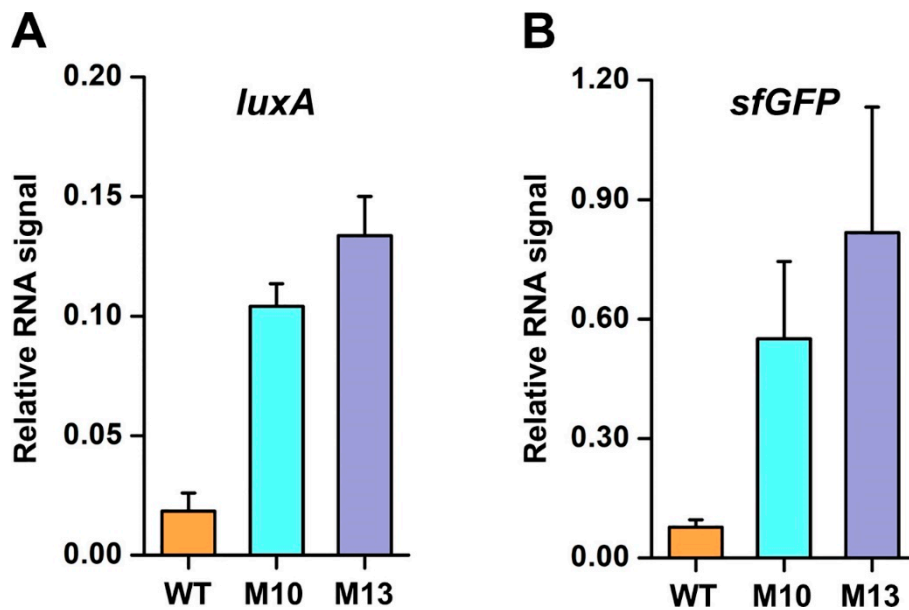

**Fig.S9** Transcript levels of gene (*luxA* or *sfGFP*) downstream of the *mer* promoter (WT, derivatives M10 or M13) (A) RT-PCR assays for *luxA* gene. (B) RT-PCR assays for *sfGFP* gene. The control group was S16 rRNA. Transcript levels of the wild-type *mer* promoter are shown in orange, mutant M10 in cyan, and mutant M10 in slateblue.





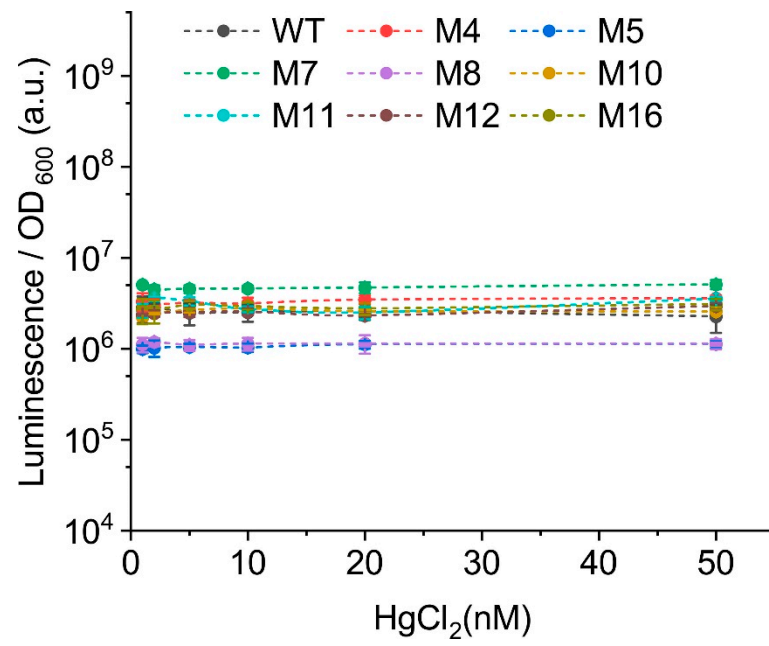

**Fig.S12 Expression levels of the *merR* gene from wild type and different derivatives.**



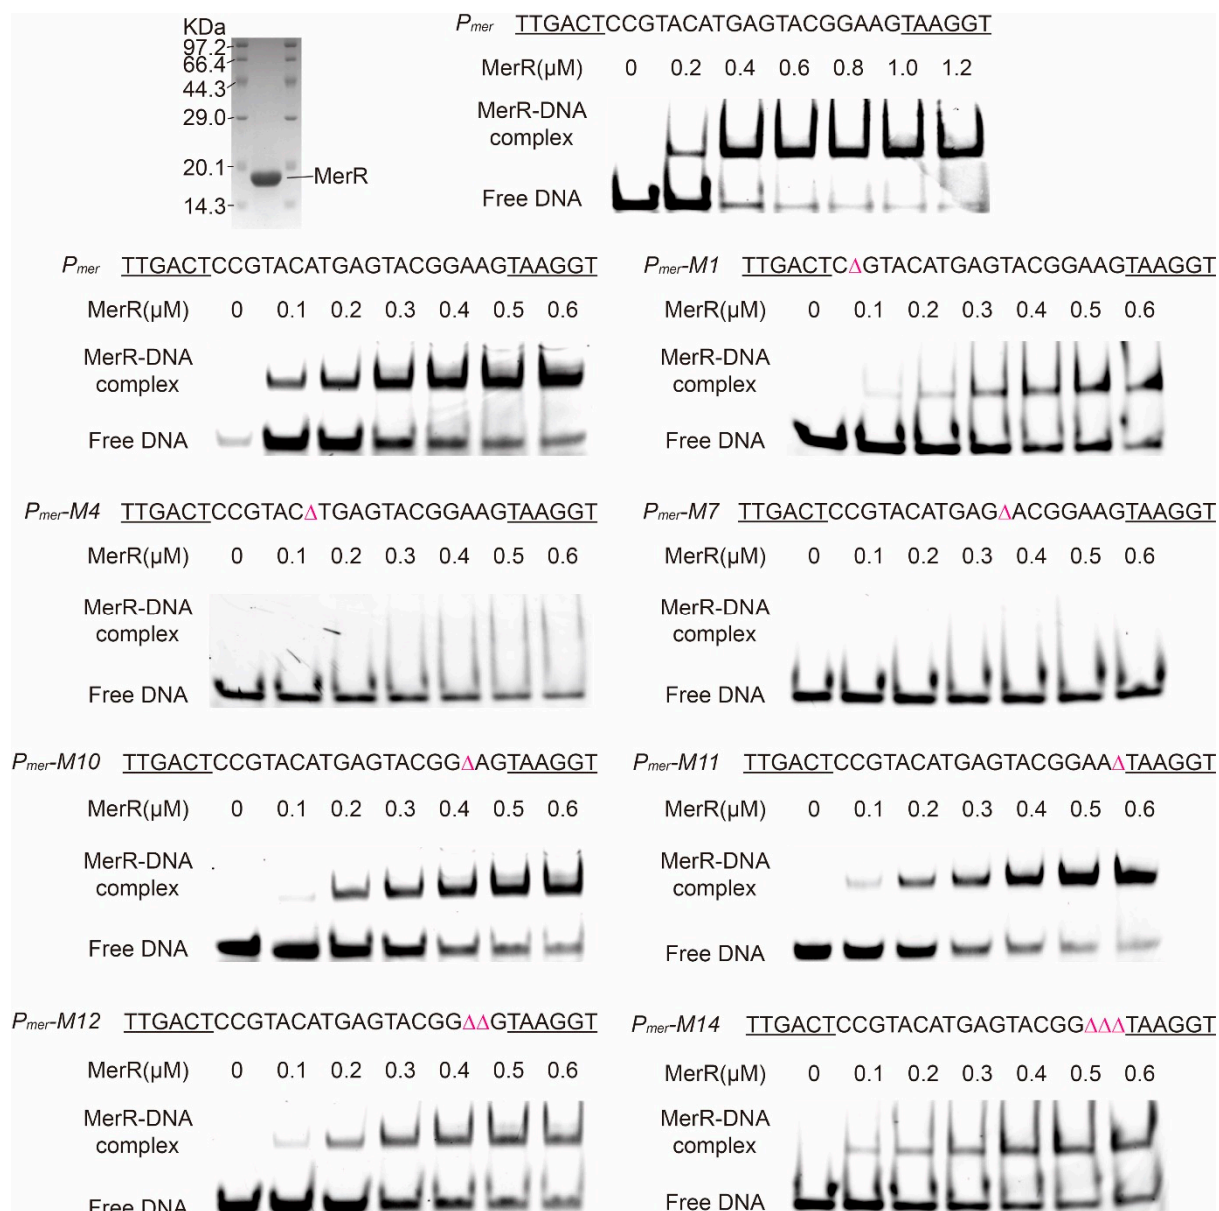

**Fig.S13 MerR binding to promoter DNA of wild type and derivatives.** Non-activated B-form is red, activated distortion-form is green. The promoter DNA fragments contain  $-35$  to  $-10$  elements and their spacer length ranges from 16-19 bp. 30 nM for DNA and 0, 100, 200, 300, 400, 500 and 600 nM for MerR were used in the final EMSA experiment.

|       |                                                             |
|-------|-------------------------------------------------------------|
| BmrR  | ATCCGTTGACT <b>CTCCC</b> CTAG <b>GAGGAG</b> GTCTTACAGTATAAG |
| CadR  | GTGGCTTGACC <b>CTATAG</b> TGG <b>CTACAG</b> GGTGTTCACTTGGCA |
| CueR  | ATTTCTTGACC <b>TTCCC</b> CTTGCT <b>GGAAG</b> GTTTAACCTTTATC |
| EcmrR | TGCCTTTGACC <b>CTCCC</b> CTA <b>AGGGGAG</b> GGTTTAGATTATCAG |
| MerR  | ATCGCTTGACT <b>CCGTAC</b> ATGAG <b>TACGGA</b> AGTAAGGTTACGC |
| MtaN  | GGGGATTGACC <b>CTAAC</b> GTTG <b>CGTGA</b> TTGTTTACGATAAAAA |
| PbrR  | ATGTCTTGACT <b>CTATAG</b> TA <b>ACTAGAG</b> GGTGTTAAATCGGCA |

**Fig.S14 Sequence alignment of promoters with 19 bp spacer between  $-10$  and  $-35$  elements regulated by MerR family TFs.** The  $-35$  and  $-10$  elements are marked with a double underline. Symmetrical sequences are shown in bold. BmrR (*Bacillus subtilis*,  $P_{bmr}$ , CP121266.1), CadR (*Pseudomonas putida*,  $P_{cad}$ , CP097525.1), CueR (*Escherichia coli*,  $P_{cue}$ , CP104618.1), EcmrR (*Escherichia coli*,  $P_{ecmr}$ ) [43], MerR (*Pseudomonas aeruginosa*,  $P_{mer}$ , CP127126.1), MtaN (*Bacillus subtilis*,  $P_{mta}$ , CP127278.1), PbrR (*Cupriavidus metallidurans*,  $P_{pbr}$ , CP046332.1).

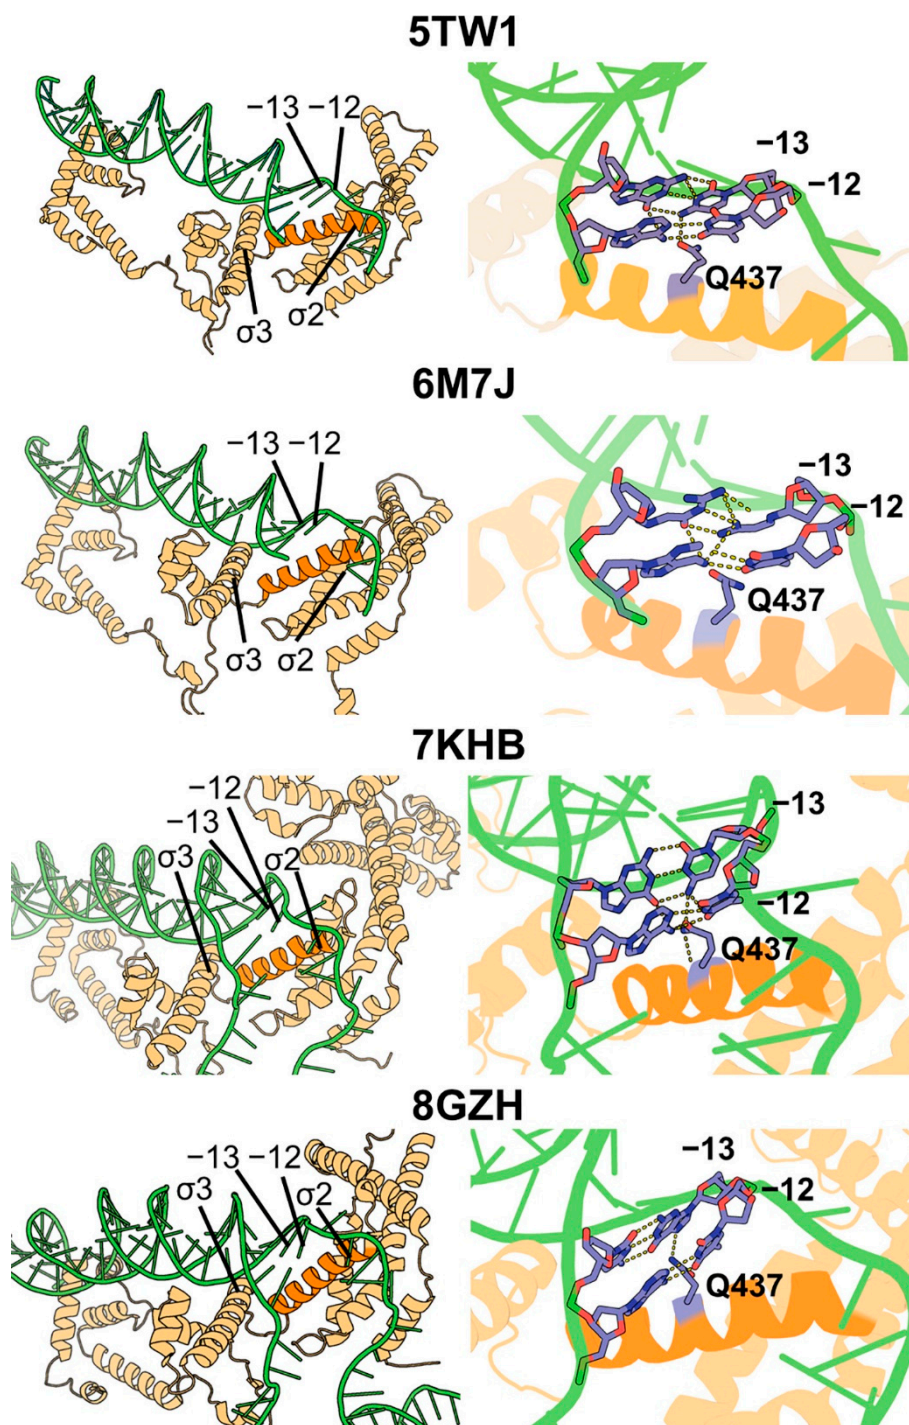

**Fig.S15 Contact of region 2 ( $\sigma_2$ ) in sigma factor 70 ( $\sigma_{70}$ ) with promoter positions  $-13$  and  $-12$  in various RNAP holoenzyme complex crystals.** The promoter DNA is green, the sigma factor is yellow and the  $\sigma_2$  is orange. The base pairs at positions  $-12$  and  $-13$  in the promoter and the

glutamine at position 437 (Q437) in  $\sigma 2$  are marked in purple. The yellow dotted lines show their interactions (hydrogen bonding). 5TW1 (PDB No.) is *Mtb* AP3 promoter from *Mycobacterium smegmatis* MC2 155 [72]. 6M7J (PDB No.) is *rrnA* P3 promoter and RNA polymerase from *Mycobacterium tuberculosis* [73]. 7KHB (PDB No.) is *rrnBP1* promoter and RNA polymerase from *Escherichia coli* K-12 [74]. 8GZH (PDB No.) is from *Synechocystis* sp. PCC 6803.

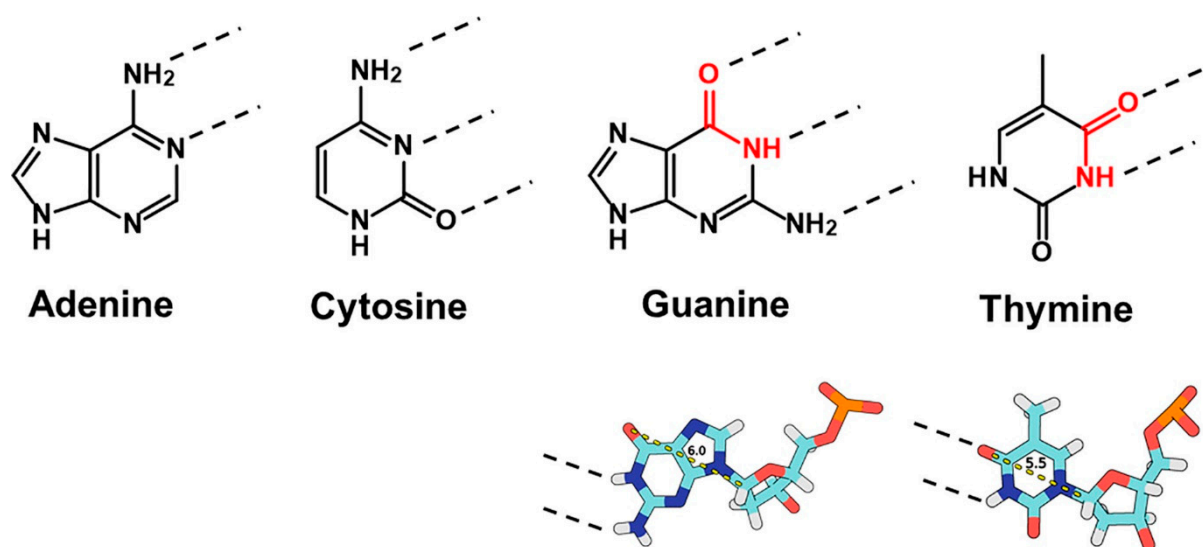

**Fig.S16 Schematic structures of the four bases and common functional groups of guanine and thymine.** Secondary amides, which form hydrogen bonds in guanine and thymine, are labelled in red.

## Supporting Tables

**Table S1 Promoter sequences.**

| Promoter                  | NCBI<br>Genbank<br>accession<br>number | Sequences                                                                                                                                                                                                                                                                                                                                                                                                                                                                                                                                                                                                                                                       |
|---------------------------|----------------------------------------|-----------------------------------------------------------------------------------------------------------------------------------------------------------------------------------------------------------------------------------------------------------------------------------------------------------------------------------------------------------------------------------------------------------------------------------------------------------------------------------------------------------------------------------------------------------------------------------------------------------------------------------------------------------------|
| <i>P<sub>mer</sub></i>    | CP104985.1                             | ATCGCTTGACTCCGTACATGAGTACGGAAGTAAGGTTACGCTATCC<br>AATTTC AATTCGAAAGGACAAGCGC                                                                                                                                                                                                                                                                                                                                                                                                                                                                                                                                                                                    |
| <i>P<sub>cpcBA</sub></i>  | CP073017.1                             | GTTATAAAATAAACTTAACAAATCTATACCCACCTGTAGAGAAGAG<br>TCCCTGAATATCAAAATGGTGGGATAAAAAGCTCAAAAAGGAAAG<br>TAGGCTGTGGTTCCCTAGGCAACAGTCTTCCCTACCCCACTGGAAA<br>CTAAAAAACGAGAAAAGTTTCGCACCGAACATCAATTGCATAATTT<br>TAGCCCTAAAACATAAGCTGAACGAAACTGGTTGTCTTCCCTTCCC<br>AATCCAGGACAATCTGAGAATCCCCTGCAACATTACTTAACAAAAA<br>AGCAGGAATAAAATTAACAAGATGTAACAGACATAAGTCCCATCAC<br>CGTTGTATAAAGTTAACTGTGGGATTGCAAAAGCATTCAAGCCTAG<br>GCGCTGAGCTGTTTGAGCATCCCGGTGGCCCTTGTCGCTGCCTCCG<br>TGTTTCTCCCTGGATTTATTTAGGTAATATCTCTCATAAATCCCCGGG<br>TAGTTAACGAAAGTTAATGGAGATCAGTAACAATAACTCTAGGGTC<br>ATTACTTTGGACTCCCTCAGTTTATCCGGGGGAATTGTGTTTAAGAA<br>AATCCCAACTCATAAAGTCAAGTAGGAGATTAATTCA |
| <i>P<sub>cpc560</sub></i> | CP073017.1                             | ACCTGTAGAGAAGAGTCCCTGAATATCAAAATGGTGGGATAAAAA<br>GCTCAAAAAGGAAAGTAGGCTGTGGTTCCCTAGGCAACAGTCTTC<br>CCTACCCCACTGGAAACTAAAAAACGAGAAAAGTTTCGCACCGAA<br>CATCAATTGCATAATTTTAGCCCTAAAACATAAGCTGAACGAACT<br>GGTTGTCTTCCCTTCCCAATCCAGGACAATCTGAGAATCCCCTGCA<br>ACATTACTTAACAAAAAAGCAGGAATAAAATTAACAAGATGTAACA<br>GACATAAGTCCCATCACCGTTGTATAAAGTTAACTGTGGGATTGCA<br>AAAGCATTCAAGCCTAGGCGCTGAGCTGTTTGAGCATCCCGGTGGC<br>CCTTGTCGCTGCCTCCGTGTTTCTCCCTGGATTTATTTAGGTAATATC<br>TCTCATAAATCCCCGGGTAGTTAACGAAAGTTAATGGAGATCAGTA<br>ACAATAACTCTAGGGTCATTACTTTGGACTCCCTCAGTTTATCCGGG<br>GGAATTGTGTTTAAGAAAATCCCAACTCATAAAGTCAAGTAGGAGA<br>TTAATTCA                                 |
| <i>P<sub>psbAII</sub></i> | CP073017.1                             | CTTTAGCGTTCCAGTGGATATTTGCTGGGGGTAAATGAAACATTGTG<br>GCGGAACCCAGGGACAATGTGACCAAAAAAATTCAGGGATATCAAT<br>AAGTATTAGGTATATGGATCATAATTGTATGCCCGACTATTGCTTAAA<br>CTGACTGACCACTGACCTTAAGAGTAATGGCGTGCAAGGCCCACT<br>GATCAATTTTCATTATTTTCATTATTTTCATCTCCATTGTCCCTGAAAAT<br>CAGTTGTGTCGCCCCCTCTACACAGCCCAGAAGTATGGTAAAGGCGC<br>ACGAAAAACCGCCAGGTAACTCTTCTCAACCCCCAAAACGCCCT<br>CTGTTTACCCATGGAAAAAACGACAATTACAAGAAAGTAAACTTA<br>TGTCATCTATAAGCTTCGTGTATATTAACCTTCTGTTACAAAGCTTTA<br>CAAACTCTCATTAATCCTTTAGACTAAGTTTAGTCAGTTCCAATCT                                                                                                                                          |

|                         |            |                                                                                                                                                                                                                                                                                                                                                                                                                                                                                                                                                                    |
|-------------------------|------------|--------------------------------------------------------------------------------------------------------------------------------------------------------------------------------------------------------------------------------------------------------------------------------------------------------------------------------------------------------------------------------------------------------------------------------------------------------------------------------------------------------------------------------------------------------------------|
|                         |            | GAACATCGACAAATACATCATAAGGAATTAT                                                                                                                                                                                                                                                                                                                                                                                                                                                                                                                                    |
| <i>P<sub>rnpB</sub></i> | CP073017.1 | TTCAATGCGGTCCAATACCTCCCCTGCCCAACTGGGTAAGCTCGCG<br>GCTCCACTGAGTAATACAGACAAGGCTAAACAGGCAAATTTTTTCA<br>TTGGTCAACTCCTAGCACCAATTTCCCAAGACTACGGAGGGGGCA<br>ATGAAGTTTCAATTAATTGGGGTCACAAACCACAGCGGCCTATGGC<br>TCTAATCAATGGCACACTAGAAAAATAGTGGAGGT                                                                                                                                                                                                                                                                                                                         |
| <i>P<sub>tic</sub></i>  | KM984770.1 | TTGACAATTAATCATCGCGGCTCGTATAATGTGTGGTCACACAGGA<br>AACAGAAT                                                                                                                                                                                                                                                                                                                                                                                                                                                                                                         |
| <i>P<sub>cmv</sub></i>  | KU550088.1 | CGTTACATAACTTACGGTAAATGGCCCGCCTGGCTGACCGCCCAAC<br>GACCCCGCCCATGACGTCAATAATGACGTATGTTCCCATAGTAAC<br>GCCAATAGGGACTTTCCATTGACGTCAATGGGTGGAGTATTTACGG<br>TAAACTGCCCCTTGGCAGTACATCAAGTGTATCATATGCCAAGTAC<br>GCCCCCTATTGACGTCAATGACGGTAAATGGCCCGCCTGGCATTATG<br>CCCAGTACATGACCTTATGGGACTTTTCTACTTGGCAGTACATCTAC<br>GTATTAGTCATCGCTATTACCATGGTGATGCGGTTTTGGCAGTACAT<br>CAATGGGCGTGGATAGCGGTTTGACTCACGGGGATTTCCAAGTCTC<br>CACCCCATGACGTCAATGGGAGTTTGTGTTTGGCACCAAAATCAAC<br>GGGACTTTCCAAAATGTCGTAACAACCTCCGCCCCATTGACGCAAAT<br>GGGCGGTAGGCGTGTACGGTGGGAGGTCTATATAAGCAGAGCT |

**Table S2 Primers for the template plasmid construction.**

| Name                              | Sequences                                         |
|-----------------------------------|---------------------------------------------------|
| <i>merR</i> F                     | GATCTCTAGACTACGGCATAGCAGAACCAGC                   |
| <i>P<sub>mer</sub>-luxAB</i> R    | ATGTAAGCAAAAAGTTTCCAAATTTTCATGCGCTTGTCTTTTCGAAT   |
| <i>P<sub>mer</sub>-luxAB</i> F    | ATTGCAAAGGACAAGCGCATGAAATTTGGAACTTTTTGCTTACAT     |
| <i>luxAB</i> R                    | GTACGAATTCTTAGGTATATTCCATGTGGTACTTCTT             |
| <i>P<sub>mer</sub>-sfGFP</i> R    | AGTTCTTCGCCTTTGCTCATGCGCTTGTCTTTTCGAAT            |
| <i>P<sub>mer</sub>-sfGFP</i> F    | ATTGCAAAGGACAAGCGCATGAGCAAAGGCGAAGAAGT            |
| <i>sfGFP</i> R                    | GTACGAATTCTTACTTGTACAGCTCGTCCATG                  |
| <i>P<sub>mer</sub></i> F          | GATCTCTAGAATCGCTTGACTCCGTACATG                    |
| <i>luxAB</i> F                    | GATCTCTAGATTAGGTATATTCCATGTGGTACTTCTTAATATTATCA   |
| <i>luxAB-P<sub>mer</sub></i> R    | GTCAAGCGATATGAAATTTGGAACTTTTTGCTTACATACC          |
| <i>luxAB-P<sub>mer</sub></i> F    | CAAAAAGTTTCCAAATTTTCATATCGCTTGACTCCGTACATG        |
| <i>P<sub>cpc560</sub></i> F       | GTACGAGCTCACCTGTAGAGAAGAGTCCCTGA                  |
| <i>P<sub>cpc560-merR</sub></i> R  | GTAGGAGATTAATTCAATGGAAAATAACCTGGAAAACCTGAC        |
| <i>P<sub>cpc560-merR</sub></i> F  | CCAGGTTATTTTCCATTGAATTAATCTCCTACTTGACTTTATGAGTTGG |
| <i>merR</i> R                     | GATCCTCGAGCTACGGCATAGCAGAACCAGC                   |
| <i>P<sub>cpcBA-sfGFP</sub></i> F  | GATCTCTAGAGTTATAAAATAAACTTAACAAATCTATACCCACCTGT   |
| <i>P<sub>cpc560-sfGFP</sub></i> F | GATCTCTAGAACCTGTAGAGAAGAGTCCCTG                   |
| <i>P<sub>psbAII-sfGFP</sub></i> F | GATCTCTAGACTTTAGCGTTCCAGTGGATATTTGC               |
| <i>P<sub>tic-sfGFP</sub></i> F    | GATCTCTAGATTGACAATTAATCATCGCGGCTC                 |
| <i>P<sub>cmv-sfGFP</sub></i> F    | GATCTCTAGACGTTACATAACTTACGGTAAATGGCC              |

**Table S3 Mutagenic primers for the *mer* promoter.**

| Name           | Sequences                                             |
|----------------|-------------------------------------------------------|
| Del -31/-30 F  | AGGTTATTTTCCATATCGCTTGACTCGTACATGAGTACGGAAGTAAGGTTACG |
| Del -31/-30 R  | CGTAACCTTACTTCCGTACTCATGTACGAGTCAAGCGATATGGAAAATAACCT |
| Del -30to-29 F | AGGTTATTTTCCATATCGCTTGACTCTACATGAGTACGGAAGTAAGGTTACG  |
| Del -30to-29 R | CGTAACCTTACTTCCGTACTCATGTAGAGTCAAGCGATATGGAAAATAACCT  |
| Del -30to-28 F | AGGTTATTTTCCATATCGCTTGACTCACATGAGTACGGAAGTAAGGTTACG   |
| Del -30to-28 R | CGTAACCTTACTTCCGTACTCATGTGAGTCAAGCGATATGGAAAATAACCT   |
| Del -25 F      | ATCGCTTGACTCCGTACTGAGTACGGAAGTAAGG                    |
| Del -25 R      | CCTTACTTCCGTACTCAGTACGGAGTCAAGCGAT                    |
| Del -25to-24 F | TCGCTTGACTCCGTACGAGTACGGAAGTAAGG                      |
| Del -25to-24 R | CCTTACTTCCGTACTCGTACGGAGTCAAGCGA                      |
| Del -25to-23 F | ATCGCTTGACTCCGTACAGTACGGAAGTAAGGTT                    |
| Del -25to-23 R | AACCTTACTTCCGTACTGTACGGAGTCAAGCGAT                    |
| Del -20 F      | TTGACTCCGTACATGAGACGGAAGTAAGGTTACG                    |
| Del -20 R      | CGTAACCTTACTTCCGTCTCATGTACGGAGTCAA                    |
| Del -19to-20 F | TTGACTCCGTACATGAGCGGAAGTAAGGTTACGC                    |
| Del -19to-20 R | GCGTAACCTTACTTCCGCTCATGTACGGAGTCAA                    |
| Del -18to-20 F | TTGACTCCGTACATGAGGGAAGTAAGGTTACGCT                    |
| Del -18to-20 R | AGCGTAACCTTACTTCCCTCATGTACGGAGTCAA                    |
| Del -15/-14 F  | GACTCCGTACATGAGTACGGAGTAAGGTTACGCTATCCAATTTCA         |
| Del -15/-14 R  | TGAAATTGGATAGCGTAACCTTACTCCGTACTCATGTACGGAGTC         |
| Del -13 F      | CCGTACATGAGTACGGAATAAGGTTACGCTATCCAA                  |
| Del -13 R      | TTGGATAGCGTAACCTTATTCCGTACTCATGTACGG                  |
| Del -15to-14 F | TCCGTACATGAGTACGGGTAAGGTTACGCTATCC                    |
| Del -15to-14 R | GGATAGCGTAACCTTACCCGTACTCATGTACGGA                    |
| Del -13to-14 F | CCGTACATGAGTACGGATAAGGTTACGCTATCCA                    |
| Del -13to-14 R | TGGATAGCGTAACCTTATCCGTACTCATGTACGG                    |
| Del -13to-15 F | TCCGTACATGAGTACGGTAAGGTTACGCTATCCA                    |
| Del -13to-15 R | TGGATAGCGTAACCTTACCGTACTCATGTACGGA                    |
| G-13A F        | CCGTACATGAGTACGGAATAAGGTTACGCTATCC                    |
| G-13A R        | GGATAGCGTAACCTTATTTCCGTACTCATGTACGG                   |
| G-13T F        | CCGTACATGAGTACGGAATTAAGGTTACGCTATCC                   |
| G-13T R        | GGATAGCGTAACCTTAATTCCGTACTCATGTACGG                   |
| G-13C F        | CCGTACATGAGTACGGAATAAGGTTACGCTATCC                    |
| G-13C R        | GGATAGCGTAACCTTAGTTCCGTACTCATGTACGG                   |



**Table S4 DNA for the electrophoretic mobility shift assay (EMSA).**

| Name                          | Sequences                              | Length |
|-------------------------------|----------------------------------------|--------|
| <i>P<sub>mer</sub></i> F      | <u>TTGACTCCGTACATGAGTACGGAAGTAAGGT</u> | 31 bp  |
| <i>P<sub>mer</sub></i> R      | <u>ACCTTACTTCCGTACTCATGTACGGAGTCAA</u> | 31 bp  |
| <i>P<sub>mer</sub></i> -M1 F  | <u>TTGACTCGTACATGAGTACGGAAGTAAGGT</u>  | 30 bp  |
| <i>P<sub>mer</sub></i> -M1 R  | <u>ACCTTACTTCCGTACTCATGTACGGAGTCAA</u> | 30 bp  |
| <i>P<sub>mer</sub></i> -M4 F  | <u>TTGACTCCGTACTGAGTACGGAAGTAAGGT</u>  | 30 bp  |
| <i>P<sub>mer</sub></i> -M4 R  | <u>ACCTTACTTCCGTACTCAGTACGGAGTCAA</u>  | 30 bp  |
| <i>P<sub>mer</sub></i> -M7 F  | <u>TTGACTCCGTACATGAGACGGAAGTAAGGT</u>  | 30 bp  |
| <i>P<sub>mer</sub></i> -M7 R  | <u>ACCTTACTTCCGTCTCATGTACGGAGTCAA</u>  | 30 bp  |
| <i>P<sub>mer</sub></i> -M10 F | <u>TTGACTCCGTACATGAGTACGGAGTAAGGT</u>  | 30 bp  |
| <i>P<sub>mer</sub></i> -M10 R | <u>ACCTTACTCCGTACTCATGTACGGAGTCAA</u>  | 30 bp  |
| <i>P<sub>mer</sub></i> -M11 F | <u>TTGACTCCGTACATGAGTACGGAATAAGGT</u>  | 30 bp  |
| <i>P<sub>mer</sub></i> -M11 R | <u>ACCTTATTCCGTACTCATGTACGGAGTCAA</u>  | 30 bp  |
| <i>P<sub>mer</sub></i> -M12 F | <u>TTGACTCCGTACATGAGTACGGGTAAGGT</u>   | 29 bp  |
| <i>P<sub>mer</sub></i> -M12 R | <u>ACCTTACCCGTACTCATGTACGGAGTCAA</u>   | 29 bp  |
| <i>P<sub>mer</sub></i> -M14 F | <u>TTGACTCCGTACATGAGTACGGTAAGGT</u>    | 28 bp  |
| <i>P<sub>mer</sub></i> -M14 R | <u>ACCTTACCGTACTCATGTACGGAGTCAA</u>    | 28 bp  |

The –35 and –10 elements are marked with an underscore.

**Table S5 Expression activity of *mer* promoter derivatives in the pMPmerS plasmid.**

| NO. | Promoter                   | Expression level (sfGFP)<br>pMPmerS (Without Hg(II)) |
|-----|----------------------------|------------------------------------------------------|
| 1   | <i>P<sub>mer-M1</sub></i>  | 777                                                  |
| 2   | <i>P<sub>mer-M2</sub></i>  | 1306                                                 |
| 3   | <i>P<sub>mer-M3</sub></i>  | 56                                                   |
| 4   | <i>P<sub>mer-M4</sub></i>  | 759                                                  |
| 5   | <i>P<sub>mer-M5</sub></i>  | 1551                                                 |
| 6   | <i>P<sub>mer-M6</sub></i>  | 74                                                   |
| 7   | <i>P<sub>mer-M7</sub></i>  | 869                                                  |
| 8   | <i>P<sub>mer-M8</sub></i>  | 1251                                                 |
| 9   | <i>P<sub>mer-M9</sub></i>  | 96                                                   |
| 10  | <i>P<sub>mer-M10</sub></i> | 511                                                  |
| 11  | <i>P<sub>mer-M11</sub></i> | 132                                                  |
| 12  | <i>P<sub>mer-M12</sub></i> | 1074                                                 |
| 13  | <i>P<sub>mer-M13</sub></i> | 568                                                  |
| 14  | <i>P<sub>mer-M14</sub></i> | 179                                                  |

**Table S6 Primers for Reverse-transcription PCR (RT-PCR) assay.**

| Name              | Sequences             |
|-------------------|-----------------------|
| <i>16S rRNA</i> F | CGTGTATGAAGAAGGCCTTCG |
| <i>16S rRNA</i> R | CTGAGCGTCAGTCTTCGTCC  |
| <i>sfGFP</i> F    | CTGCTGCCGGACAATCACTA  |

---

|                |                      |
|----------------|----------------------|
| <i>sfGFP</i> R | ATGCCATGAGTGATACCCGC |
| <i>luxA</i> F  | GTGCCGAATACGCGAAAGTC |
| <i>luxA</i> R  | CCCATCCAGTACGCCAACTT |

---
